# Supplementary material
Source: publisher figshare collection journal article supplement (https://springernature.figshare.com/ndownloader/files/22332129)
Supplement: Supplementary file 1 [file 22332129]

## Sheet: laterite cluster analysis用データ
	Additional file 1 Data used for the cluster and principal component analyses. The median concentrations of each elements and magnetic susceptibility data listed in Table 1 were standardised to a constant total.
	Monuments	Cr	Co	Cu	Y	Zr	Ti	Sr	Fe	V	As	Zn	M.S.
	no.2494	0.0172479	0.0209637	0.0567154	0.0163107	0.0290225	0.0229315	0.0101908	0.0300558	0.0243726	0.0499158	0.0323436	0.0239114
	no.3708	0.0217652	0.0227388	0.0485386	0.0270874	0.0238204	0.0281199	0.0103936	0.037972	0.029938	0.0238153	0.0259809	0.0210421
	no.3706	0.0175901	0.0282333	0.0236604	0.0461165	0.0338596	0.033888	0.0224349	0.0293651	0.0290245	0.0104643	0.0471898	0.0210421
	no.213	0.0157421	0.0268808	0.0996868	0.0163107	0.0276536	0.0217176	0.00937955	0.0363091	0.0297385	0.0161174	0.0326087	0.0253461
	no.7397	0.0360015	0.0303466	0.0123521	0.0156311	0.0256457	0.035612	0.0169846	0.0364855	0.0380972	0.00926149	0.0145811	0.0616915
	no.7081	0.0290544	0.0387997	0.0382742	0.0140777	0.0236379	0.0378096	0.0430953	0.0378109	0.0363751	0.0127496	0.0151113	0.0612133
	no.2495	0.0403135	0.0380389	0.0325331	0.0128155	0.0229077	0.0379172	0.0168578	0.0362172	0.0338234	0.0126293	0.00980912	0.0545181
	no.2496	0.0443517	0.0415046	0.0455811	0.0166019	0.0200785	0.0390698	0.0155903	0.0360077	0.0360391	0.0110657	0.0100742	0.0588221
	no.3705	0.0340851	0.0208791	0.0314892	0.0252427	0.0396094	0.0279775	0.0357437	0.0232275	0.0222199	0.00649507	0.0299576	0.0248918
	no.3707	0.0334691	0.0224852	0.0323591	0.0279612	0.0431688	0.0324158	0.036124	0.0221022	0.0292135	0.0137118	0.0307529	0.0217833
	no.1600	0.0167688	0.0167371	0.0294015	0.0405825	0.0482796	0.0407226	0.0357437	0.0172906	0.0205292	0.0123887	0.033404	0.021592
	no.3701	0.0203621	0.0171598	0.0290536	0.0261165	0.0416172	0.0235227	0.0315609	0.017903	0.0176415	0.0107048	0.0243902	0.0238875
	no.1599	0.0321344	0.0182587	0.0300974	0.0276699	0.0447203	0.0381722	0.0384055	0.023716	0.0309146	0.02586	0.0967656	0.0227637
	no.225	0.0622498	0.0301775	0.0160056	0.0301942	0.050105	0.0318858	0.0405602	0.0410478	0.0445868	0.0398124	0.0567338	0.0209464
	no.319	0.0401766	0.0363483	0.019833	0.0366019	0.0398832	0.0362214	0.0550098	0.0346343	0.0358921	0.0399326	0.0445387	0.0208986
	no.318	0.0310393	0.0289096	0.0208768	0.0239806	0.0297527	0.0270303	0.0424615	0.0309792	0.0292765	0.0324753	0.0318134	0.0236962
	no.2498	0.0425037	0.0345731	0.0274878	0.00815534	0.0250981	0.038477	0.00656569	0.0429416	0.053418	0.0080587	0.0153765	0.0483011
	no.3703	0.0269669	0.0320372	0.0290536	0.00834952	0.0295701	0.0295127	0.00501933	0.0341971	0.0460359	0.00625451	0.0135207	0.0359628
	no.3702	0.02529	0.0216399	0.0226166	0.0179612	0.0250068	0.0303888	0.00766842	0.0241357	0.0365431	0.00469088	0.0169671	0.0401234
	no.306	0.0365148	0.0346576	0.0278358	0.0168932	0.0364151	0.0351516	0.0119146	0.03931	0.0508978	0.0159971	0.038176	0.0576266
	no.1974	0.0212518	0.0316145	0.0146138	0.0175728	0.02884	0.0284064	0.0106471	0.0231643	0.0278799	0.00625451	0.0281018	0.0381866
	no.5426	0.0290202	0.03153	0.0135699	0.0136893	0.0206261	0.0339046	0.00827682	0.027649	0.0298225	0.0116671	0.0243902	0.0187466
	no.1025	0.0177612	0.0449704	0.0118302	0.00941748	0.0173405	0.0315579	0.00243361	0.0330673	0.029623	0.00697619	0.0092789	0.0380192
	no.2695	0.0459601	0.0351648	0.0236604	0.0149515	0.0232728	0.0330434	0.00566576	0.0407661	0.0403339	0.00914121	0.0164369	0.026446
	no.466	0.0236474	0.0281488	0.019833	0.0240777	0.0262846	0.0229448	0.0343495	0.0219049	0.0161189	0.0364446	0.0294274	0.0145382
	Angkor Thom (Outer enclosure)	0.0187536	0.0229924	0.0153097	0.0326214	0.0226339	0.0175688	0.0541226	0.0190941	0.0126851	0.0784219	0.0217391	0.0107362
	Prasat Suor Prat (S2,N3)	0.0274118	0.0210482	0.0233125	0.0320388	0.0200785	0.0223867	0.0334622	0.0206664	0.0168329	0.0500361	0.0145811	0.0139165
	Banteay Samre (Outer enclosure)	0.0322713	0.0242604	0.0180933	0.0362136	0.0240029	0.0230938	0.0584321	0.0248311	0.0219154	0.0744527	0.0283669	0.0181249
	Banteay Samre (Inner enclosure)	0.0112932	0.0233305	0.0254001	0.0334951	0.0201698	0.0156233	0.0522213	0.0194844	0.011803	0.0661535	0.0448038	0.0145142
	Chau Say Tevoda (Outer enclosure)	0.02683	0.0284024	0.0309673	0.0216505	0.0219038	0.0213003	0.0324482	0.0281048	0.017862	0.0426991	0.0304878	0.0214007
	Ta Prohm (Inner enclosure)	0.0260771	0.025951	0.0229645	0.0368932	0.0232728	0.0186688	0.0480385	0.0218435	0.018135	0.0810681	0.0220042	0.0167619
	Banteay Kdei (Inner enclosure)	0.0335033	0.0290786	0.0247042	0.107767	0.0256457	0.0232793	0.0448698	0.0171584	0.0292555	0.0423382	0.0249205	0.0173119
	Thommanon (Foundation)	0.024982	0.0335587	0.0248782	0.0361165	0.0211737	0.0244186	0.0394195	0.0291218	0.0227239	0.0520808	0.0145811	0.0213051
	Chau Say Tevoda (Foundation)	0.0244003	0.0338969	0.0288796	0.0298058	0.0235466	0.0212324	0.0382787	0.0313639	0.0144072	0.0476305	0.0389714	0.02537
	Angkor Wat (Outer enclosure )	0.0132097	0.024683	0.0285317	0.0990291	0.0213562	0.0140269	0.0456303	0.0100716	0.0160244	0.0322348	0.0318134	0.0145621
